# Supplementary material for: Probing RbBr solvation in freestanding sub-2 nm water clusters
Source: Royal Society of Chemistry journal article supplement (doi:10.1039/c7cp04398h), 2017-01-01
Supplement: c7cp04398h1.pdf [file c7cp04398h1.pdf]

Electronic Supplementary Material

## Probing RbBr solvation in freestanding sub-2 nm water clusters

Lauri Hautala,<sup>\*a</sup> Kari Jänkälä,<sup>a</sup> Mikko-Heikki Mikkilä,<sup>b</sup> Paavo Turunen,<sup>a</sup> Nønne L. Prisle,<sup>a</sup>  
Minna Patanen,<sup>a</sup> Maxim Tchaplyguine,<sup>b</sup> Marko Huttula<sup>a</sup>

<sup>a</sup> Nano and Molecular Systems research unit, University of Oulu, P.O. Box 3000, 90014 University of Oulu, Finland

<sup>b</sup> MAX IV Laboratory, Lund University, Box 118, 22100 Lund, Sweden

<sup>\*</sup>Corresponding author: Lauri Hautala, [lauri.hautala@oulu.fi](mailto:lauri.hautala@oulu.fi)

### Spectrum comparisons

Figure S1 displays photoelectron spectra recorded from Rb 3d region at concentration values of 0.5 mol/kg and 21 mol/kg. The monomer response has been indicated and labeled. The spectra have been normalized with respect to the monomer Rb 3d<sub>3/2</sub> spin-orbit component. From Fig. S1, one can see that at the low concentration (red curve) the cluster response is characterized by peak maxima at ~115 eV and ~116.5 eV which roughly obey the statistical 3 : 2 area ratio expected for spin-orbit split 3d<sub>5/2</sub> and 3d<sub>3/2</sub> components. This has been labeled as M<sub>1</sub> in the main article. At higher concentration (black spectrum) the peak at 116.5 eV grows relative to peak at 115 eV. This is accompanied by intensity increase of the monomer Rb 3d<sub>5/2</sub> peak relative to monomer Rb 3d<sub>3/2</sub> peak. As the statistical ratio of the spin-orbit split components does not depend on the concentration, we reach a conclusion that an additional peak doublet, named M<sub>2</sub> in the main article, must be responsible of these changes in the spectrum.

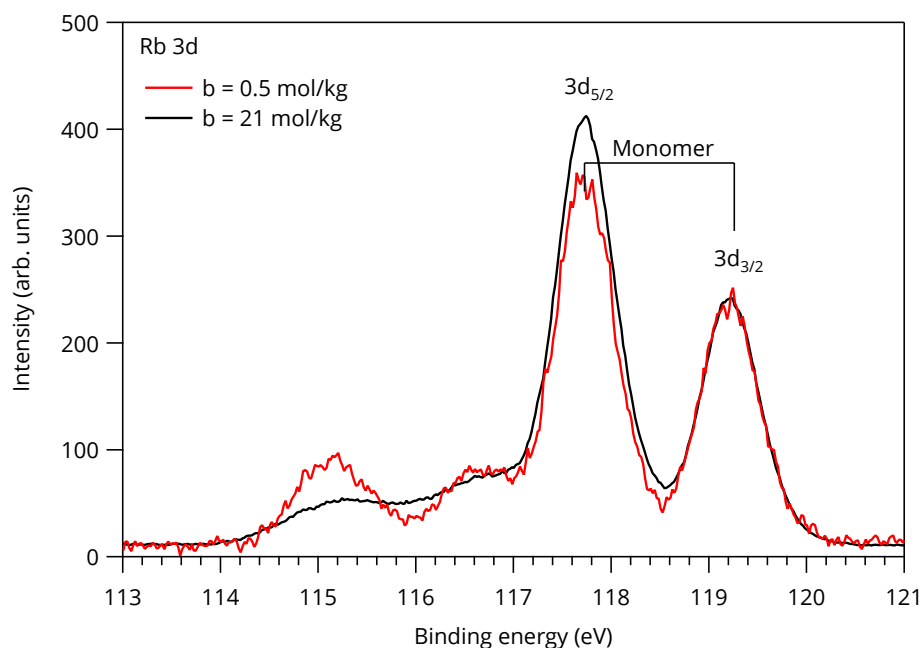

**Fig. S1** Comparison of Rb 3d region photoelectron spectra for two concentration values. The spectra have been normalized with respect to the RbBr monomer Rb 3d<sub>3/2</sub> component (labeled).

## Electronic Supplementary Material

Figure S2 shows a comparison of four Rb 3d region photoelectron spectra: Two recorded from anhydrous RbBr clusters and two from water containing clusters. The hydrated and anhydrous cluster spectra are also included in Figs. 2 and 4 of the main article, respectively. As the monomer to cluster intensity ratio changes between the spectra, approximate scaling was performed by using the peak at 115 eV for easier comparison of the cluster related spectral features between 114 eV and 117 eV.

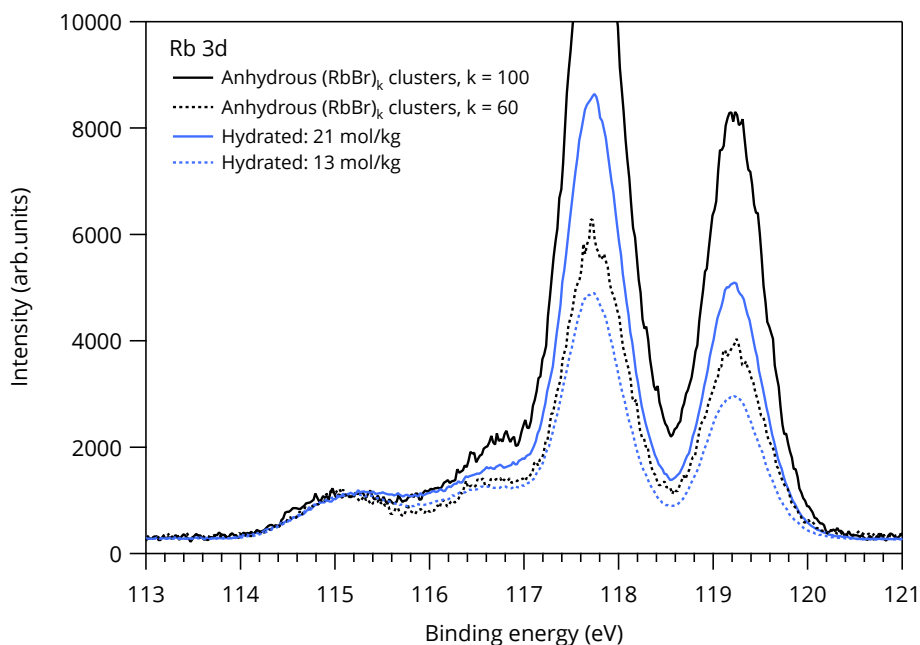

**Fig. S2** Comparison of Rb 3d region photoelectron spectra recorded from anhydrous RbBr clusters and hydrated clusters. The spectra have been scaled so that the peak intensity at 115 eV is roughly comparable.
